# Supplementary material
Source: Springer Nature journal article supplement (https://www.springermedizin.de/resource/supplementary/13030_2014_151_MOESM4_ESM.pdf/9644852)

## Health: I would not feel comfortable...

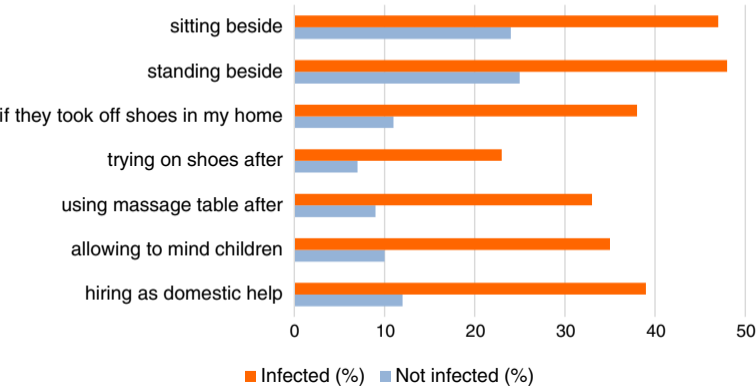

Supplement: MOESM4 [file 9644852]
